# Supplementary material
Source: Springer Nature journal article supplement (https://www.springermedizin.de/resource/supplementary/12904_2013_244_MOESM3_ESM.pdf/9517750)
Supplement: MOESM3 [file 9517750]

**Question 1.****This instrument is easy to use.**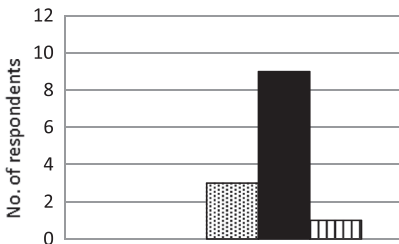**Question 2.****This scale measures sedation well.**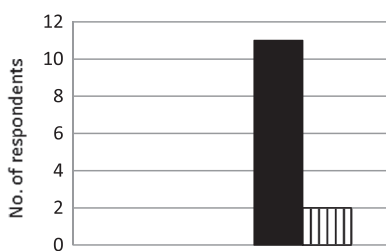**Question 3.****This scale measures agitation well.**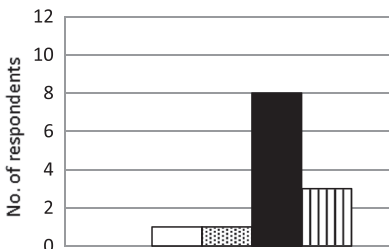**Question 4.****This scale improves patient care.**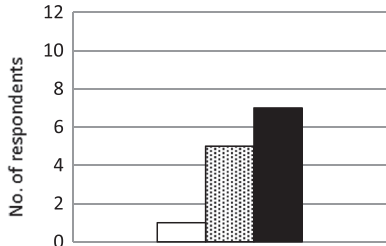**Question 5.****This instrument assists with monitoring patients for sedation purposes.**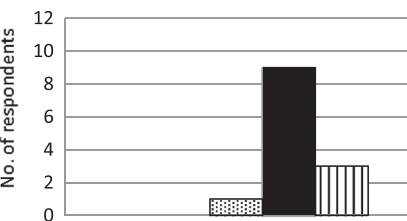**Question 6.****This instrument assists with monitoring patients who have an agitated delirium.**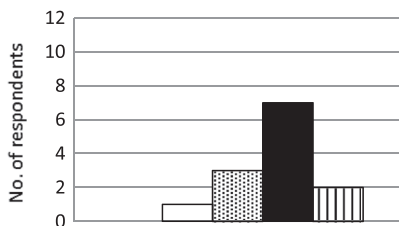**Question 7.****This instrument is useful to aid communication between different shifts and other disciplines.**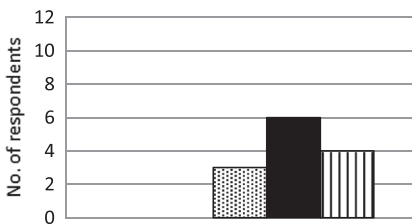**Responses**

-  Strongly disagree
-  Disagree
-  Neither agree or disagree
-  Agree
-  Strongly agree
